# Supplementary material for: Multiple bonding versus cage formation in organophosphorus compounds: the gas-phase structures of tricyclo-P3(CBut)2Cl and PC–But determined by electron diffraction and computational methods
Source: Royal Society of Chemistry journal article supplement (doi:10.1039/c1dt10041f), 2011-01-01

## Multiple bonding versus cage formation in organophosphorus compounds: the gas-phase structures of tricyclo- $P_3(CBu^t)_2Cl$ and $P\equiv C-$ $Bu^t$ determined by electron diffraction and computational methods

Derek A. Wann, Sarah L. Masters, Heather E. Robertson, Michael Green, Richard J. Kilby, Christopher A. Russell, Cameron Jones and David W. H. Rankin

### Electronic Supplementary Information

**Table S1** Nozzle-to-film distances / mm, weighting functions /  $nm^{-1}$ , scale factors, correlation parameters and electron wavelengths / pm used in the electron diffraction studies of tricyclo- $P_3C_2(Bu^t)_2Cl$  and  $P\equiv C-Bu^t$ .

|                    | Nozzle-to-film distance <sup>a</sup> | $\Delta s$ | $s_{min}$ | $sw_1$ | $sw_2$ | $s_{max}$ | Scale factor <sup>b</sup> | Correlation parameter | Electron wavelength |
|--------------------|--------------------------------------|------------|-----------|--------|--------|-----------|---------------------------|-----------------------|---------------------|
| $P_3C_2(Bu^t)_2Cl$ | 249.8                                | 1          | 20        | 40     | 129    | 150       | 0.632(6)                  | 0.489                 | 6.18                |
|                    | 89.4                                 | 2          | 70        | 90     | 276    | 320       | 0.678(13)                 | 0.191                 | 6.18                |
| $P\equiv C-Bu^t$   | 290.9                                | 1          | 20        | 40     | 112    | 130       | 0.760(1)                  | 0.492                 | 6.13                |
|                    | 130.4                                | 2          | 80        | 100    | 258    | 300       | 0.774(8)                  | 0.284                 | 6.13                |

<sup>a</sup> Determined by reference to the scattering pattern of benzene. <sup>b</sup> Values in parentheses are the estimated standard deviations.

**Table S2** Interatomic distances ( $r_a$  / pm), refined and calculated amplitudes of vibration ( $u$  / pm) and distance corrections ( $k_{h1}$  / pm) for the SARACEN-restrained GED structure of tricyclo-P<sub>3</sub>C<sub>2</sub>(Bu<sup>t</sup>)<sub>2</sub>Cl.<sup>a</sup>

|          | Atom pair   | $r_a$     | $u(\text{exp.})^b$     | $k_{h1}$ | $u(\text{calc.})$ |
|----------|-------------|-----------|------------------------|----------|-------------------|
| $u_{27}$ | C(10)–H(18) | 110.5(2)  | 7.2(2)                 | 0.4      | 7.5               |
| $u_{28}$ | C(10)–H(19) | 110.5(2)  | 7.2(tied to $u_{27}$ ) | 0.4      | 7.5               |
| $u_{26}$ | C(9)–H(15)  | 110.5(2)  | 7.2(tied to $u_{27}$ ) | 0.4      | 7.5               |
| $u_{29}$ | C(8)–H(13)  | 110.5(2)  | 7.2(tied to $u_{27}$ ) | 0.4      | 7.5               |
| $u_{24}$ | C(10)–H(17) | 110.5(2)  | 7.2(tied to $u_{27}$ ) | 0.4      | 7.5               |
| $u_{23}$ | C(9)–H(16)  | 110.5(2)  | 7.2(tied to $u_{27}$ ) | 0.4      | 7.5               |
| $u_{22}$ | C(8)–H(11)  | 110.5(2)  | 7.2(tied to $u_{27}$ ) | 0.4      | 7.5               |
| $u_{25}$ | C(9)–H(14)  | 110.5(2)  | 7.2(tied to $u_{27}$ ) | 0.4      | 7.5               |
| $u_{21}$ | C(8)–H(12)  | 110.5(2)  | 7.2(tied to $u_{27}$ ) | 0.4      | 7.4               |
| $u_{30}$ | C(3)–C(7)   | 153.4(3)  | 4.1(2)                 | 0.1      | 5.0               |
| $u_{31}$ | C(7)–C(10)  | 154.4(1)  | 4.1(tied to $u_{30}$ ) | 0.1      | 5.1               |
| $u_{32}$ | C(7)–C(9)   | 154.4(1)  | 4.1(tied to $u_{30}$ ) | 0.2      | 5.1               |
| $u_{33}$ | C(7)–C(8)   | 154.4(1)  | 4.1(tied to $u_{30}$ ) | 0.2      | 5.1               |
| $u_{36}$ | H(11)⋯H(12) | 181.2(7)  | 11.9(fixed)            | 0.0      | 11.9              |
| $u_{39}$ | H(14)⋯H(16) | 181.2(7)  | 11.9(fixed)            | 0.0      | 11.9              |
| $u_{34}$ | H(17)⋯H(19) | 181.3(7)  | 11.9(fixed)            | 0.0      | 11.9              |
| $u_{35}$ | H(17)⋯H(18) | 181.3(7)  | 11.9(fixed)            | 0.0      | 11.9              |
| $u_{42}$ | H(18)⋯H(19) | 181.3(7)  | 11.9(fixed)            | 0.0      | 11.9              |
| $u_{40}$ | H(14)⋯H(15) | 181.3(7)  | 11.9(fixed)            | 0.0      | 11.9              |
| $u_{37}$ | H(15)⋯H(16) | 181.3(7)  | 11.9(fixed)            | 0.0      | 11.9              |
| $u_{41}$ | H(11)⋯H(13) | 181.3(7)  | 11.9(fixed)            | 0.0      | 11.9              |
| $u_{38}$ | H(12)⋯H(13) | 181.3(7)  | 11.9(fixed)            | 0.0      | 11.9              |
| $u_{43}$ | P(1)–C(3)   | 183.1(3)  | 4.0(2)                 | 0.1      | 5.1               |
| $u_{44}$ | C(3)–P(4)   | 187.0(3)  | 4.3(tied to $u_{43}$ ) | 0.1      | 5.5               |
| $u_{45}$ | C(3)–P(5)   | 190.8(3)  | 4.6(tied to $u_{43}$ ) | 0.2      | 5.8               |
| $u_1$    | P(4)–P(5)   | 214.5(13) | 5.4(tied to $u_2$ )    | 0.0      | 4.8               |
| $u_{51}$ | C(7)⋯H(16)  | 215.1(8)  | 11.8(tied to $u_2$ )   | –0.1     | 10.5              |
| $u_{53}$ | C(7)⋯H(19)  | 215.1(8)  | 11.8(tied to $u_2$ )   | –0.1     | 10.5              |
| $u_{46}$ | C(7)⋯H(17)  | 215.1(8)  | 11.8(tied to $u_2$ )   | –0.1     | 10.5              |
| $u_{54}$ | C(7)⋯H(18)  | 215.1(8)  | 11.8(tied to $u_2$ )   | –0.1     | 10.5              |
| $u_{49}$ | C(7)⋯H(11)  | 215.1(8)  | 11.8(tied to $u_2$ )   | –0.1     | 10.5              |
| $u_{50}$ | C(7)⋯H(14)  | 215.1(8)  | 11.8(tied to $u_2$ )   | –0.1     | 10.5              |
| $u_{52}$ | C(7)⋯H(12)  | 215.1(8)  | 11.8(tied to $u_2$ )   | –0.1     | 10.4              |
| $u_{48}$ | C(7)⋯H(15)  | 215.2(8)  | 11.8(tied to $u_2$ )   | –0.1     | 10.5              |
| $u_{47}$ | C(7)⋯H(13)  | 215.2(8)  | 11.8(tied to $u_2$ )   | –0.1     | 10.5              |
| $u_2$    | P(1)–Cl(6)  | 216.6(15) | 6.7(2)                 | 0.2      | 5.9               |
| $u_3$    | C(2)⋯C(3)   | 226.6(5)  | 6.1(tied to $u_2$ )    | 0.1      | 5.4               |
| $u_{66}$ | H(11)⋯H(19) | 244.1(38) | 25.1(fixed)            | 2.9      | 25.1              |
| $u_{65}$ | H(12)⋯H(16) | 245.1(37) | 24.9(fixed)            | 3.1      | 24.9              |
| $u_{55}$ | H(13)⋯H(17) | 248.4(28) | 23.7(fixed)            | 3.3      | 23.7              |
| $u_{60}$ | C(3)⋯C(8)   | 249.5(4)  | 6.9(tied to $u_4$ )    | 0.0      | 7.3               |
| $u_{58}$ | C(3)⋯C(9)   | 249.5(4)  | 6.8(tied to $u_4$ )    | 0.0      | 7.2               |

|                         |               |           |                                       |      |      |
|-------------------------|---------------|-----------|---------------------------------------|------|------|
| <i>u</i> <sub>56</sub>  | C(8)···C(10)  | 250.8(14) | 7.0(tied to <i>u</i> <sub>4</sub> )   | 0.0  | 7.4  |
| <i>u</i> <sub>62</sub>  | C(3)···C(10)  | 251.6(6)  | 6.8(tied to <i>u</i> <sub>4</sub> )   | 0.0  | 7.1  |
| <i>u</i> <sub>63</sub>  | H(13)···H(15) | 251.6(28) | 24.4(fixed)                           | 3.2  | 24.4 |
| <i>u</i> <sub>59</sub>  | C(8)···C(9)   | 252.0(14) | 7.1(tied to <i>u</i> <sub>4</sub> )   | 0.0  | 7.4  |
| <i>u</i> <sub>61</sub>  | H(15)···H(17) | 252.4(38) | 24.2(fixed)                           | 3.3  | 24.2 |
| <i>u</i> <sub>64</sub>  | H(14)···H(18) | 254.6(57) | 25.0(fixed)                           | 3.1  | 25.0 |
| <i>u</i> <sub>57</sub>  | C(9)···C(10)  | 254.9(21) | 7.1(tied to <i>u</i> <sub>4</sub> )   | 0.0  | 7.4  |
| <i>u</i> <sub>4</sub>   | P(1)···P(5)   | 262.6(5)  | 6.4(2)                                | -0.1 | 6.8  |
| <i>u</i> <sub>77</sub>  | C(8)···H(19)  | 269.8(24) | 16.5(tied to <i>u</i> <sub>4</sub> )  | 0.2  | 17.3 |
| <i>u</i> <sub>82</sub>  | C(3)···H(12)  | 269.9(8)  | 15.6(tied to <i>u</i> <sub>4</sub> )  | 0.2  | 16.3 |
| <i>u</i> <sub>81</sub>  | C(3)···H(14)  | 269.9(8)  | 16.0(tied to <i>u</i> <sub>4</sub> )  | 0.3  | 16.8 |
| <i>u</i> <sub>76</sub>  | C(3)···H(11)  | 269.9(8)  | 15.9(tied to <i>u</i> <sub>4</sub> )  | 0.3  | 16.7 |
| <i>u</i> <sub>78</sub>  | C(3)···H(16)  | 269.9(8)  | 15.8(tied to <i>u</i> <sub>4</sub> )  | 0.3  | 16.6 |
| <i>u</i> <sub>79</sub>  | C(10)···H(11) | 270.5(24) | 16.5(tied to <i>u</i> <sub>4</sub> )  | 0.2  | 17.3 |
| <i>u</i> <sub>80</sub>  | C(8)···H(16)  | 271.1(23) | 16.5(tied to <i>u</i> <sub>4</sub> )  | 0.2  | 17.3 |
| <i>u</i> <sub>73</sub>  | C(9)···H(12)  | 271.1(23) | 16.3(tied to <i>u</i> <sub>4</sub> )  | 0.3  | 17.1 |
| <i>u</i> <sub>67</sub>  | C(10)···H(13) | 271.7(17) | 15.8(tied to <i>u</i> <sub>4</sub> )  | 0.4  | 16.6 |
| <i>u</i> <sub>68</sub>  | C(8)···H(17)  | 272.3(17) | 15.9(tied to <i>u</i> <sub>4</sub> )  | 0.3  | 16.7 |
| <i>u</i> <sub>83</sub>  | C(3)···H(19)  | 272.5(10) | 15.5(tied to <i>u</i> <sub>4</sub> )  | 0.3  | 16.3 |
| <i>u</i> <sub>84</sub>  | C(3)···H(18)  | 272.6(10) | 15.4(tied to <i>u</i> <sub>4</sub> )  | 0.3  | 16.1 |
| <i>u</i> <sub>72</sub>  | C(9)···H(13)  | 274.0(17) | 16.0(tied to <i>u</i> <sub>4</sub> )  | 0.3  | 16.8 |
| <i>u</i> <sub>71</sub>  | C(8)···H(15)  | 274.1(17) | 16.2(tied to <i>u</i> <sub>4</sub> )  | 0.4  | 17.0 |
| <i>u</i> <sub>70</sub>  | C(10)···H(15) | 275.4(26) | 16.2(tied to <i>u</i> <sub>4</sub> )  | 0.4  | 17.0 |
| <i>u</i> <sub>69</sub>  | C(9)···H(17)  | 276.0(26) | 16.0(tied to <i>u</i> <sub>4</sub> )  | 0.3  | 16.8 |
| <i>u</i> <sub>74</sub>  | C(9)···H(18)  | 276.4(36) | 16.4(tied to <i>u</i> <sub>4</sub> )  | 0.2  | 17.3 |
| <i>u</i> <sub>75</sub>  | C(10)···H(14) | 277.1(35) | 16.5(tied to <i>u</i> <sub>4</sub> )  | 0.3  | 17.3 |
| <i>u</i> <sub>5</sub>   | P(1)···P(4)   | 279.1(4)  | 5.4(tied to <i>u</i> <sub>4</sub> )   | 0.0  | 5.7  |
| <i>u</i> <sub>86</sub>  | P(4)···H(19)  | 292.9(12) | 26.0(tied to <i>u</i> <sub>4</sub> )  | 4.6  | 24.1 |
| <i>u</i> <sub>87</sub>  | Cl(6)···H(12) | 297.8(47) | 27.5(tied to <i>u</i> <sub>4</sub> )  | 9.9  | 28.9 |
| <i>u</i> <sub>91</sub>  | H(13)···H(19) | 301.3(23) | 28.4(fixed)                           | -0.7 | 28.4 |
| <i>u</i> <sub>88</sub>  | P(1)···C(7)   | 302.9(8)  | 7.9(tied to <i>u</i> <sub>98</sub> )  | -0.1 | 7.3  |
| <i>u</i> <sub>95</sub>  | H(11)···H(17) | 303.3(23) | 28.3(fixed)                           | -0.8 | 28.3 |
| <i>u</i> <sub>97</sub>  | H(13)···H(16) | 303.9(22) | 28.3(fixed)                           | -0.9 | 28.3 |
| <i>u</i> <sub>93</sub>  | H(12)···H(15) | 304.0(22) | 28.7(fixed)                           | -0.7 | 28.7 |
| <i>u</i> <sub>90</sub>  | P(4)···C(7)   | 304.7(3)  | 8.4(tied to <i>u</i> <sub>98</sub> )  | -0.4 | 7.8  |
| <i>u</i> <sub>92</sub>  | P(1)···H(16)  | 306.2(27) | 23.0(tied to <i>u</i> <sub>4</sub> )  | 5.0  | 24.2 |
| <i>u</i> <sub>85</sub>  | P(5)···H(18)  | 306.6(27) | 25.3(tied to <i>u</i> <sub>98</sub> ) | 5.4  | 23.5 |
| <i>u</i> <sub>94</sub>  | H(15)···H(18) | 307.0(36) | 28.8(fixed)                           | -0.7 | 28.8 |
| <i>u</i> <sub>89</sub>  | P(5)···C(7)   | 307.1(11) | 8.5(tied to <i>u</i> <sub>98</sub> )  | -0.1 | 7.9  |
| <i>u</i> <sub>99</sub>  | P(1)···H(12)  | 307.6(22) | 27.1(tied to <i>u</i> <sub>98</sub> ) | 3.7  | 25.1 |
| <i>u</i> <sub>96</sub>  | H(14)···H(17) | 309.0(35) | 28.6(fixed)                           | -0.8 | 28.6 |
| <i>u</i> <sub>100</sub> | P(5)···H(14)  | 309.7(40) | 39.8(tied to <i>u</i> <sub>6</sub> )  | 3.7  | 28.4 |
| <i>u</i> <sub>98</sub>  | C(3)···Cl(6)  | 312.9(6)  | 10.4(3)                               | -0.1 | 9.6  |
| <i>u</i> <sub>118</sub> | Cl(6)···H(11) | 325.6(39) | 67.6(tied to <i>u</i> <sub>6</sub> )  | 2.6  | 48.1 |
| <i>u</i> <sub>103</sub> | P(4)···C(10)  | 330.0(16) | 22.6(tied to <i>u</i> <sub>6</sub> )  | 0.6  | 16.1 |
| <i>u</i> <sub>115</sub> | P(4)···H(18)  | 332.6(32) | 47.5(tied to <i>u</i> <sub>6</sub> )  | -0.3 | 33.8 |

|                         |               |           |                                       |      |      |
|-------------------------|---------------|-----------|---------------------------------------|------|------|
| <i>u</i> <sub>101</sub> | P(4)···H(11)  | 335.2(38) | 30.7(tied to <i>u</i> <sub>98</sub> ) | 2.8  | 28.5 |
| <i>u</i> <sub>105</sub> | C(3)···H(15)  | 342.9(5)  | 14.2(tied to <i>u</i> <sub>6</sub> )  | -1.5 | 10.1 |
| <i>u</i> <sub>106</sub> | C(3)···H(13)  | 343.0(5)  | 14.2(tied to <i>u</i> <sub>6</sub> )  | -1.5 | 10.1 |
| <i>u</i> <sub>108</sub> | C(10)···H(12) | 344.2(11) | 14.2(tied to <i>u</i> <sub>6</sub> )  | -1.5 | 10.1 |
| <i>u</i> <sub>109</sub> | C(8)···H(18)  | 344.2(12) | 14.3(tied to <i>u</i> <sub>6</sub> )  | -1.5 | 10.2 |
| <i>u</i> <sub>107</sub> | C(3)···H(17)  | 344.5(6)  | 14.2(tied to <i>u</i> <sub>6</sub> )  | -1.4 | 10.1 |
| <i>u</i> <sub>112</sub> | C(8)···H(14)  | 345.0(11) | 14.3(tied to <i>u</i> <sub>6</sub> )  | -1.5 | 10.2 |
| <i>u</i> <sub>111</sub> | C(9)···H(11)  | 345.0(11) | 14.3(tied to <i>u</i> <sub>6</sub> )  | -1.5 | 10.2 |
| <i>u</i> <sub>104</sub> | P(1)···C(9)   | 345.6(21) | 18.1(tied to <i>u</i> <sub>98</sub> ) | 0.9  | 16.8 |
| <i>u</i> <sub>110</sub> | C(10)···H(16) | 347.1(17) | 14.3(tied to <i>u</i> <sub>6</sub> )  | -1.5 | 10.2 |
| <i>u</i> <sub>116</sub> | P(1)···C(8)   | 347.1(19) | 24.3(tied to <i>u</i> <sub>6</sub> )  | 0.2  | 17.3 |
| <i>u</i> <sub>113</sub> | C(9)···H(19)  | 347.2(17) | 14.3(tied to <i>u</i> <sub>6</sub> )  | -1.5 | 10.2 |
| <i>u</i> <sub>102</sub> | P(5)···C(10)  | 347.7(20) | 22.4(tied to <i>u</i> <sub>6</sub> )  | 1.1  | 16.0 |
| <i>u</i> <sub>6</sub>   | P(4)···Cl(6)  | 348.6(13) | 20.7(5)                               | 0.0  | 14.7 |
| <i>u</i> <sub>117</sub> | P(5)···C(9)   | 353.4(33) | 27.5(tied to <i>u</i> <sub>6</sub> )  | 0.1  | 19.6 |
| <i>u</i> <sub>121</sub> | Cl(6)···C(8)  | 353.4(31) | 30.2(tied to <i>u</i> <sub>6</sub> )  | 3.2  | 21.5 |
| <i>u</i> <sub>119</sub> | P(1)···H(14)  | 362.0(30) | 49.0(tied to <i>u</i> <sub>6</sub> )  | -0.4 | 34.9 |
| <i>u</i> <sub>114</sub> | P(5)···H(19)  | 365.5(34) | 48.3(tied to <i>u</i> <sub>6</sub> )  | -0.1 | 34.4 |
| <i>u</i> <sub>135</sub> | P(1)···H(11)  | 366.6(27) | 45.9(tied to <i>u</i> <sub>6</sub> )  | -1.5 | 32.7 |
| <i>u</i> <sub>132</sub> | H(12)···H(19) | 368.4(24) | 17.9(fixed)                           | -1.8 | 17.9 |
| <i>u</i> <sub>133</sub> | H(11)···H(18) | 368.6(24) | 17.9(fixed)                           | -1.8 | 17.9 |
| <i>u</i> <sub>129</sub> | H(12)···H(14) | 369.0(23) | 17.8(fixed)                           | -1.9 | 17.8 |
| <i>u</i> <sub>128</sub> | H(11)···H(16) | 369.1(23) | 17.9(fixed)                           | -1.8 | 17.9 |
| <i>u</i> <sub>120</sub> | P(4)···C(8)   | 370.1(25) | 26.7(tied to <i>u</i> <sub>6</sub> )  | -0.5 | 19.0 |
| <i>u</i> <sub>123</sub> | H(13)···H(18) | 370.7(18) | 17.5(fixed)                           | -1.6 | 17.5 |
| <i>u</i> <sub>122</sub> | H(12)···H(17) | 370.8(18) | 17.5(fixed)                           | -1.6 | 17.5 |
| <i>u</i> <sub>127</sub> | H(13)···H(14) | 372.6(18) | 17.8(fixed)                           | -1.7 | 17.8 |
| <i>u</i> <sub>126</sub> | H(11)···H(15) | 372.7(18) | 17.7(fixed)                           | -1.7 | 17.7 |
| <i>u</i> <sub>124</sub> | H(16)···H(17) | 373.3(25) | 17.7(fixed)                           | -1.7 | 17.7 |
| <i>u</i> <sub>125</sub> | H(15)···H(19) | 373.3(25) | 17.7(fixed)                           | -1.6 | 17.7 |
| <i>u</i> <sub>131</sub> | H(16)···H(18) | 374.5(35) | 17.9(fixed)                           | -1.9 | 17.9 |
| <i>u</i> <sub>130</sub> | H(14)···H(19) | 374.8(35) | 17.9(fixed)                           | -1.7 | 17.9 |
| <i>u</i> <sub>134</sub> | C(3)···C(20)  | 379.5(4)  | 9.0(tied to <i>u</i> <sub>6</sub> )   | -0.3 | 6.4  |
| <i>u</i> <sub>136</sub> | P(5)···H(16)  | 379.7(37) | 34.9(tied to <i>u</i> <sub>7</sub> )  | -1.8 | 34.0 |
| <i>u</i> <sub>137</sub> | Cl(6)···C(7)  | 394.7(20) | 18.4(tied to <i>u</i> <sub>6</sub> )  | -0.3 | 13.1 |
| <i>u</i> <sub>138</sub> | P(4)···H(12)  | 400.6(33) | 44.8(tied to <i>u</i> <sub>6</sub> )  | -2.2 | 31.9 |
| <i>u</i> <sub>139</sub> | Cl(6)···H(16) | 421.3(60) | 60.2(tied to <i>u</i> <sub>6</sub> )  | 2.0  | 42.8 |
| <i>u</i> <sub>140</sub> | P(4)···C(9)   | 425.7(9)  | 9.0(tied to <i>u</i> <sub>7</sub> )   | -2.1 | 8.7  |
| <i>u</i> <sub>144</sub> | H(12)···H(18) | 426.1(14) | 13.3(fixed)                           | -2.5 | 13.3 |
| <i>u</i> <sub>142</sub> | H(11)···H(14) | 426.3(14) | 13.4(fixed)                           | -2.6 | 13.4 |
| <i>u</i> <sub>145</sub> | H(16)···H(19) | 427.1(16) | 13.3(fixed)                           | -2.5 | 13.3 |
| <i>u</i> <sub>141</sub> | P(1)···C(10)  | 428.5(7)  | 8.3(tied to <i>u</i> <sub>7</sub> )   | -1.9 | 8.1  |
| <i>u</i> <sub>149</sub> | P(4)···H(14)  | 430.6(22) | 19.9(tied to <i>u</i> <sub>7</sub> )  | -2.0 | 19.4 |
| <i>u</i> <sub>143</sub> | P(5)···C(8)   | 432.8(5)  | 9.1(tied to <i>u</i> <sub>7</sub> )   | -2.0 | 8.8  |
| <i>u</i> <sub>147</sub> | P(4)···H(17)  | 435.5(12) | 17.1(tied to <i>u</i> <sub>7</sub> )  | -2.0 | 16.6 |
| <i>u</i> <sub>7</sub>   | P(5)···Cl(6)  | 443.1(5)  | 8.3(4)                                | -0.6 | 8.1  |

|                         |               |           |                                        |      |      |
|-------------------------|---------------|-----------|----------------------------------------|------|------|
| <i>u</i> <sub>152</sub> | C(3)···H(25)  | 444.3(9)  | 23.3(tied to <i>u</i> <sub>7</sub> )   | -0.1 | 22.7 |
| <i>u</i> <sub>160</sub> | C(3)···H(29)  | 444.5(20) | 21.9(tied to <i>u</i> <sub>7</sub> )   | -0.3 | 21.3 |
| <i>u</i> <sub>151</sub> | C(3)···H(24)  | 444.5(14) | 23.6(tied to <i>u</i> <sub>7</sub> )   | 0.3  | 22.9 |
| <i>u</i> <sub>156</sub> | C(3)···H(27)  | 444.7(19) | 23.2(tied to <i>u</i> <sub>7</sub> )   | 0.0  | 22.6 |
| <i>u</i> <sub>148</sub> | P(1)···H(15)  | 446.4(19) | 17.3(tied to <i>u</i> <sub>7</sub> )   | -1.7 | 16.8 |
| <i>u</i> <sub>162</sub> | P(1)···H(19)  | 446.6(10) | 17.2(tied to <i>u</i> <sub>7</sub> )   | -2.6 | 16.8 |
| <i>u</i> <sub>153</sub> | P(1)···H(18)  | 447.1(18) | 18.6(tied to <i>u</i> <sub>7</sub> )   | -2.1 | 18.1 |
| <i>u</i> <sub>150</sub> | P(5)···H(11)  | 448.2(19) | 20.1(tied to <i>u</i> <sub>7</sub> )   | -2.2 | 19.6 |
| <i>u</i> <sub>161</sub> | P(1)···H(13)  | 448.5(16) | 17.3(tied to <i>u</i> <sub>7</sub> )   | -1.9 | 16.9 |
| <i>u</i> <sub>146</sub> | P(5)···H(17)  | 448.9(18) | 16.8(tied to <i>u</i> <sub>7</sub> )   | -1.5 | 16.4 |
| <i>u</i> <sub>157</sub> | C(3)···H(31)  | 449.0(12) | 22.5(tied to <i>u</i> <sub>7</sub> )   | 0.6  | 21.9 |
| <i>u</i> <sub>154</sub> | C(3)···H(32)  | 449.0(16) | 22.0(tied to <i>u</i> <sub>7</sub> )   | 0.8  | 21.4 |
| <i>u</i> <sub>155</sub> | C(3)···C(21)  | 452.3(6)  | 10.8(tied to <i>u</i> <sub>7</sub> )   | -0.6 | 10.5 |
| <i>u</i> <sub>159</sub> | C(3)···C(22)  | 452.4(13) | 10.4(tied to <i>u</i> <sub>7</sub> )   | -0.8 | 10.1 |
| <i>u</i> <sub>167</sub> | Cl(6)···H(13) | 453.2(35) | 23.5(tied to <i>u</i> <sub>7</sub> )   | -0.5 | 22.9 |
| <i>u</i> <sub>163</sub> | P(5)···H(15)  | 453.4(29) | 19.5(tied to <i>u</i> <sub>7</sub> )   | -2.0 | 19.0 |
| <i>u</i> <sub>166</sub> | P(5)···H(12)  | 453.5(12) | 17.0(tied to <i>u</i> <sub>7</sub> )   | -2.9 | 16.5 |
| <i>u</i> <sub>164</sub> | P(4)···H(16)  | 453.9(9)  | 17.2(tied to <i>u</i> <sub>7</sub> )   | -2.9 | 16.8 |
| <i>u</i> <sub>158</sub> | C(3)···C(23)  | 455.6(9)  | 10.0(tied to <i>u</i> <sub>7</sub> )   | -0.2 | 9.8  |
| <i>u</i> <sub>165</sub> | P(4)···H(13)  | 466.4(21) | 19.4(tied to <i>u</i> <sub>7</sub> )   | -2.4 | 18.9 |
| <i>u</i> <sub>168</sub> | Cl(6)···C(9)  | 472.3(40) | 29.2(tied to <i>u</i> <sub>7</sub> )   | -1.6 | 28.4 |
| <i>u</i> <sub>174</sub> | Cl(6)···H(19) | 499.0(29) | 31.1(tied to <i>u</i> <sub>173</sub> ) | -2.5 | 32.4 |
| <i>u</i> <sub>169</sub> | P(4)···H(15)  | 511.2(8)  | 11.4(tied to <i>u</i> <sub>173</sub> ) | -3.1 | 11.9 |
| <i>u</i> <sub>170</sub> | P(1)···H(17)  | 513.0(10) | 11.1(tied to <i>u</i> <sub>173</sub> ) | -2.7 | 11.6 |
| <i>u</i> <sub>173</sub> | Cl(6)···C(10) | 514.3(15) | 16.9(9)                                | -2.9 | 17.7 |
| <i>u</i> <sub>171</sub> | P(5)···H(13)  | 517.1(10) | 11.6(tied to <i>u</i> <sub>173</sub> ) | -2.8 | 12.1 |
| <i>u</i> <sub>172</sub> | Cl(6)···H(14) | 527.7(36) | 37.0(tied to <i>u</i> <sub>173</sub> ) | -5.0 | 38.7 |
| <i>u</i> <sub>8</sub>   | C(7)···C(20)  | 532.5(6)  | 6.9(tied to <i>u</i> <sub>173</sub> )  | -0.8 | 7.2  |
| <i>u</i> <sub>175</sub> | Cl(6)···H(15) | 550.8(43) | 26.9(tied to <i>u</i> <sub>173</sub> ) | -2.8 | 28.1 |
| <i>u</i> <sub>176</sub> | C(3)···H(26)  | 555.4(6)  | 17.3(tied to <i>u</i> <sub>191</sub> ) | -2.8 | 12.1 |
| <i>u</i> <sub>178</sub> | C(3)···H(28)  | 555.9(12) | 11.3(tied to <i>u</i> <sub>191</sub> ) | -2.8 | 11.8 |
| <i>u</i> <sub>14</sub>  | H(12)···H(29) | 558.0(68) | 35.8(fixed)                            | 6.0  | 35.8 |
| <i>u</i> <sub>11</sub>  | H(16)···H(25) | 558.1(15) | 39.6(fixed)                            | 7.5  | 39.6 |
| <i>u</i> <sub>177</sub> | C(3)···H(30)  | 558.1(7)  | 16.7(tied to <i>u</i> <sub>191</sub> ) | -2.4 | 11.6 |
| <i>u</i> <sub>13</sub>  | H(11)···H(27) | 558.2(63) | 39.2(fixed)                            | 6.7  | 39.2 |
| <i>u</i> <sub>9</sub>   | H(14)···H(24) | 558.7(51) | 39.8(fixed)                            | 9.0  | 39.8 |
| <i>u</i> <sub>179</sub> | Cl(6)···H(18) | 566.9(12) | 28.4(tied to <i>u</i> <sub>191</sub> ) | -5.3 | 19.7 |
| <i>u</i> <sub>12</sub>  | H(19)···H(31) | 567.9(25) | 38.0(fixed)                            | 8.1  | 38.0 |
| <i>u</i> <sub>10</sub>  | H(18)···H(32) | 568.4(57) | 36.3(fixed)                            | 9.1  | 36.3 |
| <i>u</i> <sub>182</sub> | H(14)···H(25) | 581.8(26) | 48.6(fixed)                            | 3.7  | 48.6 |
| <i>u</i> <sub>193</sub> | H(11)···H(29) | 581.9(62) | 45.4(fixed)                            | 2.0  | 45.4 |
| <i>u</i> <sub>183</sub> | C(7)···H(25)  | 582.0(9)  | 35.9(tied to <i>u</i> <sub>191</sub> ) | -0.5 | 25.0 |
| <i>u</i> <sub>180</sub> | C(7)···H(24)  | 582.2(22) | 36.0(tied to <i>u</i> <sub>191</sub> ) | 0.2  | 25.1 |
| <i>u</i> <sub>186</sub> | C(7)···H(27)  | 582.3(31) | 35.3(tied to <i>u</i> <sub>191</sub> ) | -0.6 | 24.5 |
| <i>u</i> <sub>187</sub> | C(7)···H(29)  | 582.3(33) | 33.0(tied to <i>u</i> <sub>191</sub> ) | -0.9 | 23.0 |
| <i>u</i> <sub>190</sub> | Cl(6)···H(17) | 585.7(20) | 28.6(tied to <i>u</i> <sub>191</sub> ) | -3.3 | 19.9 |

|           |               |           |                          |      |      |
|-----------|---------------|-----------|--------------------------|------|------|
| $u_{184}$ | C(7)···H(31)  | 586.8(12) | 34.5(tied to $u_{191}$ ) | 0.2  | 24.0 |
| $u_{181}$ | C(7)···H(32)  | 587.0(24) | 33.4(tied to $u_{191}$ ) | 0.6  | 23.2 |
| $u_{185}$ | H(18)···H(31) | 591.3(35) | 45.9(fixed)              | 4.2  | 45.9 |
| $u_{188}$ | C(7)···C(21)  | 598.8(8)  | 17.5(tied to $u_{191}$ ) | -1.1 | 12.2 |
| $u_{191}$ | C(7)···C(22)  | 598.9(23) | 16.5(10)                 | -1.5 | 11.5 |
| $u_{195}$ | C(9)···H(25)  | 600.3(14) | 47.3(tied to $u_{191}$ ) | 2.8  | 32.9 |
| $u_{192}$ | C(9)···H(24)  | 600.6(36) | 47.2(tied to $u_{191}$ ) | 3.6  | 32.9 |
| $u_{197}$ | C(8)···H(27)  | 600.6(55) | 45.5(tied to $u_{191}$ ) | 2.0  | 31.6 |
| $u_{199}$ | C(8)···H(29)  | 600.7(58) | 42.7(tied to $u_{191}$ ) | 1.5  | 29.7 |
| $u_{189}$ | C(7)···C(23)  | 602.2(11) | 16.1(tied to $u_{191}$ ) | -0.7 | 11.2 |
| $u_{201}$ | H(12)···H(25) | 605.9(38) | 36.0(fixed)              | 2.6  | 36.0 |
| $u_{196}$ | C(10)···H(31) | 609.1(24) | 44.4(tied to $u_{191}$ ) | 3.4  | 30.9 |
| $u_{194}$ | C(10)···H(32) | 609.4(42) | 43.0(tied to $u_{191}$ ) | 3.9  | 29.9 |
| $u_{200}$ | H(11)···H(31) | 610.1(35) | 38.6(fixed)              | 3.3  | 38.6 |
| $u_{198}$ | H(14)···H(32) | 614.6(48) | 38.3(fixed)              | 4.8  | 38.3 |
| $u_{15}$  | C(9)···C(21)  | 630.8(21) | 28.0(tied to $u_{191}$ ) | 1.0  | 19.5 |
| $u_{17}$  | C(8)···C(22)  | 630.8(49) | 25.7(tied to $u_{191}$ ) | -0.1 | 17.9 |
| $u_{16}$  | C(10)···C(23) | 638.7(28) | 17.0(tied to $u_{215}$ ) | 1.4  | 17.0 |
| $u_{206}$ | C(8)···H(25)  | 647.4(26) | 39.0(tied to $u_{191}$ ) | -1.2 | 27.2 |
| $u_{207}$ | C(9)···H(29)  | 647.6(28) | 38.7(tied to $u_{191}$ ) | -1.1 | 26.9 |
| $u_{204}$ | C(10)···H(27) | 651.4(25) | 28.9(tied to $u_{215}$ ) | -0.9 | 29.0 |
| $u_{205}$ | C(8)···H(31)  | 653.0(24) | 28.2(tied to $u_{215}$ ) | -0.5 | 28.3 |
| $u_{202}$ | C(10)···H(24) | 654.2(33) | 29.0(tied to $u_{215}$ ) | 0.1  | 29.1 |
| $u_{203}$ | C(9)···H(32)  | 655.8(33) | 28.4(tied to $u_{215}$ ) | 0.4  | 28.5 |
| $u_{212}$ | H(11)···H(25) | 661.2(32) | 36.6(fixed)              | -3.8 | 36.6 |
| $u_{213}$ | H(12)···H(24) | 661.2(20) | 37.7(fixed)              | -3.3 | 37.7 |
| $u_{211}$ | H(11)···H(32) | 665.1(20) | 37.8(fixed)              | -3.0 | 37.8 |
| $u_{216}$ | H(12)···H(31) | 665.2(33) | 36.8(fixed)              | -3.2 | 36.8 |
| $u_{209}$ | H(16)···H(32) | 668.4(26) | 39.2(fixed)              | -2.5 | 39.2 |
| $u_{208}$ | H(14)···H(31) | 668.6(28) | 38.4(fixed)              | -2.4 | 38.4 |
| $u_{215}$ | C(8)···C(21)  | 676.8(17) | 15.7(9)                  | -2.8 | 15.7 |
| $u_{214}$ | C(8)···C(23)  | 679.9(16) | 16.4(tied to $u_{215}$ ) | -2.4 | 16.4 |
| $u_{219}$ | C(8)···H(24)  | 680.7(13) | 27.1(tied to $u_{215}$ ) | -3.6 | 27.2 |
| $u_{220}$ | C(9)···H(27)  | 680.8(24) | 26.3(tied to $u_{215}$ ) | -3.9 | 26.4 |
| $u_{210}$ | C(9)···C(23)  | 681.5(19) | 17.1(tied to $u_{215}$ ) | -1.9 | 17.2 |
| $u_{222}$ | C(10)···H(29) | 683.0(24) | 25.7(tied to $u_{215}$ ) | -4.1 | 25.8 |
| $u_{217}$ | C(10)···H(25) | 684.2(11) | 28.1(tied to $u_{215}$ ) | -3.7 | 28.2 |
| $u_{221}$ | C(8)···H(32)  | 684.9(13) | 26.1(tied to $u_{215}$ ) | -3.2 | 26.2 |
| $u_{218}$ | C(9)···H(31)  | 686.3(13) | 27.1(tied to $u_{215}$ ) | -3.2 | 27.2 |
| $u_{227}$ | H(11)···H(24) | 693.1(16) | 30.5(fixed)              | -6.0 | 30.5 |
| $u_{232}$ | H(12)···H(32) | 697.2(16) | 29.2(fixed)              | -5.5 | 29.2 |
| $u_{228}$ | H(16)···H(31) | 697.6(14) | 31.0(fixed)              | -5.5 | 31.0 |
| $u_{223}$ | C(7)···H(26)  | 704.0(7)  | 13.4(tied to $u_{215}$ ) | -3.6 | 13.5 |
| $u_{225}$ | C(7)···H(28)  | 704.3(21) | 12.8(tied to $u_{215}$ ) | -3.7 | 12.9 |
| $u_{224}$ | C(7)···H(30)  | 707.0(9)  | 12.7(tied to $u_{215}$ ) | -3.2 | 12.8 |
| $u_{230}$ | H(15)···H(25) | 707.9(14) | 34.1(fixed)              | -0.8 | 34.1 |

|           |               |           |                          |      |      |
|-----------|---------------|-----------|--------------------------|------|------|
| $u_{234}$ | H(12)···H(28) | 708.3(59) | 30.7(fixed)              | -1.7 | 30.7 |
| $u_{226}$ | H(14)···H(26) | 708.3(39) | 34.0(fixed)              | 0.0  | 34.0 |
| $u_{233}$ | H(11)···H(28) | 708.4(56) | 32.7(fixed)              | -1.5 | 32.7 |
| $u_{231}$ | H(17)···H(31) | 716.8(24) | 32.1(fixed)              | -0.1 | 32.1 |
| $u_{229}$ | H(17)···H(32) | 717.0(44) | 31.0(fixed)              | 0.5  | 31.0 |
| $u_{235}$ | C(9)···H(26)  | 738.6(21) | 21.1(tied to $u_{215}$ ) | -2.4 | 21.1 |
| $u_{237}$ | C(8)···H(28)  | 738.8(48) | 19.4(tied to $u_{215}$ ) | -3.2 | 19.4 |
| $u_{236}$ | C(10)···H(30) | 745.9(27) | 18.7(tied to $u_{215}$ ) | -1.9 | 18.8 |
| $u_{243}$ | H(12)···H(26) | 748.3(34) | 27.4(fixed)              | -3.6 | 27.4 |
| $u_{242}$ | H(13)···H(25) | 748.3(24) | 27.9(fixed)              | -3.3 | 27.9 |
| $u_{241}$ | H(11)···H(30) | 750.7(31) | 29.7(fixed)              | -3.1 | 29.7 |
| $u_{240}$ | H(13)···H(31) | 753.0(22) | 29.1(fixed)              | -2.5 | 29.1 |
| $u_{238}$ | H(14)···H(30) | 753.4(35) | 29.8(fixed)              | -1.8 | 29.8 |
| $u_{239}$ | H(15)···H(32) | 755.3(36) | 28.9(fixed)              | -1.9 | 28.9 |
| $u_{254}$ | H(11)···H(26) | 776.3(30) | 27.6(fixed)              | -5.8 | 27.6 |
| $u_{251}$ | H(13)···H(24) | 776.5(16) | 28.3(fixed)              | -4.9 | 28.3 |
| $u_{255}$ | H(12)···H(30) | 778.1(32) | 26.9(fixed)              | -5.4 | 26.9 |
| $u_{249}$ | C(8)···H(26)  | 778.1(21) | 16.6(tied to $u_{215}$ ) | -5.1 | 16.6 |
| $u_{247}$ | C(9)···H(28)  | 778.5(14) | 16.6(tied to $u_{215}$ ) | -4.6 | 16.7 |
| $u_{250}$ | H(16)···H(30) | 779.3(12) | 29.4(fixed)              | -4.8 | 29.4 |
| $u_{248}$ | C(8)···H(30)  | 780.6(20) | 17.4(tied to $u_{215}$ ) | -4.7 | 17.4 |
| $u_{253}$ | H(13)···H(32) | 780.9(17) | 27.4(fixed)              | -4.4 | 27.4 |
| $u_{246}$ | C(10)···H(28) | 781.3(12) | 17.4(tied to $u_{215}$ ) | -4.5 | 17.4 |
| $u_{244}$ | C(9)···H(30)  | 781.9(18) | 18.1(tied to $u_{215}$ ) | -4.0 | 18.1 |
| $u_{252}$ | H(15)···H(31) | 782.0(15) | 28.3(fixed)              | -4.7 | 28.3 |
| $u_{245}$ | C(10)···H(26) | 782.4(19) | 17.8(tied to $u_{215}$ ) | -4.3 | 17.8 |
| $u_{18}$  | H(15)···H(26) | 845.7(21) | 22.6(fixed)              | -5.8 | 22.6 |
| $u_{20}$  | H(13)···H(28) | 846.2(48) | 20.8(fixed)              | -6.4 | 20.8 |
| $u_{19}$  | H(17)···H(30) | 853.0(27) | 20.3(fixed)              | -5.2 | 20.3 |
| $u_{258}$ | H(13)···H(26) | 881.0(18) | 17.5(fixed)              | -7.4 | 17.5 |
| $u_{257}$ | H(13)···H(30) | 883.6(16) | 18.4(fixed)              | -6.9 | 18.4 |
| $u_{256}$ | H(15)···H(30) | 884.6(18) | 18.8(fixed)              | -6.6 | 18.8 |

<sup>a</sup> Estimated standard deviations, as obtained in the least squares refinement, are given in parentheses. <sup>b</sup> Amplitudes not refined were fixed at the values obtained using the force field calculated at the MP2/6-311+G\* level.

**Table S3** Least-squares correlation matrix ( $\times 100$ ) for tricyclo- $P_3C_2(Bu^t)_2Cl$ .<sup>a</sup>

|           | $p_{10}$ | $p_{11}$ | $p_{12}$ | $p_{16}$ | $p_{17}$ | $p_{18}$ | $u_1$ | $u_{23}$ | $u_{36}$ | $u_{85}$ | $u_{102}$ | $u_{134}$ | $k_2$ |
|-----------|----------|----------|----------|----------|----------|----------|-------|----------|----------|----------|-----------|-----------|-------|
| $p_5$     |          |          | 61       |          | -52      |          |       |          |          |          | 65        |           |       |
| $p_6$     |          |          |          |          | 50       |          |       |          |          |          |           |           |       |
| $p_7$     | -64      | -92      |          | -95      | -61      | 51       | -88   |          |          |          |           |           |       |
| $p_8$     | -55      |          |          |          | -50      |          |       | 52       |          |          |           |           |       |
| $p_{10}$  |          | 59       |          | 59       |          |          | 61    |          |          |          |           |           |       |
| $p_{11}$  |          |          |          | 90       |          | -50      | 83    |          |          |          |           |           |       |
| $p_{12}$  |          |          |          |          |          |          |       |          |          |          | 54        |           |       |
| $p_{13}$  |          |          |          |          |          | -52      |       | -68      |          |          |           | 74        |       |
| $p_{16}$  |          |          |          |          | 65       | -54      | 83    |          |          |          |           |           |       |
| $p_{18}$  |          |          |          |          |          |          |       | 63       |          |          |           | -50       |       |
| $u_{36}$  |          |          |          |          |          |          |       |          |          |          |           | -50       |       |
| $u_{50}$  |          |          |          |          |          |          |       |          |          | 50       |           |           | 62    |
| $u_{85}$  |          |          |          |          |          |          |       |          |          |          |           |           | 83    |
| $u_{102}$ |          |          |          |          |          |          |       |          |          |          |           |           | 54    |

<sup>a</sup> Only elements with absolute values  $\geq 50\%$  are shown.



**Table S4** GED coordinates for tricyclo-P<sub>3</sub>C<sub>2</sub>(Bu<sup>t</sup>)<sub>2</sub>Cl.

| Atom  | <i>x</i> | <i>y</i> | <i>z</i> |
|-------|----------|----------|----------|
| P(1)  | 0.0000   | -0.8114  | 1.1883   |
| C(2)  | 1.1334   | 0.0000   | 0.0000   |
| C(3)  | -1.1334  | 0.0000   | 0.0000   |
| P(4)  | 0.0000   | -0.0137  | -1.4873  |
| P(5)  | 0.0000   | 1.5329   | 0.0000   |
| Cl(6) | 0.0000   | -2.8736  | 0.5276   |
| C(7)  | -2.6669  | 0.0037   | 0.0000   |
| C(8)  | -3.1600  | -1.4520  | -0.1378  |
| C(9)  | -3.1550  | 0.5912   | 1.3409   |
| C(10) | -3.1886  | 0.8219   | -1.1999  |
| H(11) | -2.7715  | -1.8568  | -1.0901  |
| H(12) | -2.7719  | -2.0282  | 0.7220   |
| H(13) | -4.2653  | -1.4410  | -0.1370  |
| H(14) | -2.7630  | 1.6211   | 1.4268   |
| H(15) | -4.2603  | 0.5906   | 1.3332   |
| H(16) | -2.7670  | -0.0465  | 2.1560   |
| H(17) | -4.2935  | 0.8054   | -1.1716  |
| H(18) | -2.8082  | 1.8551   | -1.1016  |
| H(19) | -2.8118  | 0.3506   | -2.1260  |
| C(20) | 2.6669   | 0.0037   | 0.0000   |
| C(21) | 3.1550   | 0.5912   | 1.3409   |
| C(22) | 3.1600   | -1.4520  | -0.1378  |
| C(23) | 3.1886   | 0.8219   | -1.1999  |
| H(24) | 2.7630   | 1.6211   | 1.4268   |
| H(25) | 2.7670   | -0.0465  | 2.1560   |
| H(26) | 4.2603   | 0.5906   | 1.3332   |
| H(27) | 2.7715   | -1.8568  | -1.0901  |
| H(28) | 4.2653   | -1.4410  | -0.1370  |
| H(29) | 2.7719   | -2.0282  | 0.7220   |
| H(30) | 4.2935   | 0.8054   | -1.1716  |
| H(31) | 2.8118   | 0.3506   | -2.1260  |
| H(32) | 2.8082   | 1.8551   | -1.1016  |

**Table S5** Calculated coordinates (MP2/6-311+G\*) for tricyclo-P<sub>3</sub>C<sub>2</sub>(Bu<sup>t</sup>)<sub>2</sub>Cl.

| Atom  | <i>x</i> | <i>y</i> | <i>z</i> |
|-------|----------|----------|----------|
| P(1)  | 0.0000   | -0.8949  | 0.9472   |
| C(2)  | 1.1179   | 0.2522   | 0.0449   |
| C(3)  | -1.1179  | 0.2522   | 0.0449   |
| P(4)  | 0.0000   | 0.6703   | -1.4043  |
| P(5)  | 0.0000   | 1.7271   | 0.5278   |
| Cl(6) | 0.0000   | -2.6658  | -0.2685  |
| C(7)  | -2.6318  | 0.2927   | 0.0450   |
| C(8)  | -3.1635  | -0.8594  | -0.8181  |
| C(9)  | -3.1335  | 0.1341   | 1.4840   |
| C(10) | -3.1224  | 1.6247   | -0.5303  |
| H(11) | -2.8053  | -0.7715  | -1.8489  |
| H(12) | -2.8410  | -1.8299  | -0.4325  |
| H(13) | -4.2589  | -0.8419  | -0.8319  |
| H(14) | -2.7504  | 0.9354   | 2.1249   |
| H(15) | -4.2280  | 0.1679   | 1.5093   |
| H(16) | -2.8175  | -0.8236  | 1.9100   |
| H(17) | -4.2170  | 1.6375   | -0.5630  |
| H(18) | -2.7952  | 2.4711   | 0.0827   |
| H(19) | -2.7581  | 1.7802   | -1.5516  |
| C(20) | 2.6318   | 0.2927   | 0.0450   |
| C(21) | 3.1335   | 0.1341   | 1.4840   |
| C(22) | 3.1635   | -0.8594  | -0.8181  |
| C(23) | 3.1224   | 1.6247   | -0.5303  |
| H(24) | 2.7504   | 0.9354   | 2.1249   |
| H(25) | 2.8175   | -0.8236  | 1.9100   |
| H(26) | 4.2280   | 0.1679   | 1.5093   |
| H(27) | 2.8053   | -0.7715  | -1.8489  |
| H(28) | 4.2589   | -0.8419  | -0.8319  |
| H(29) | 2.8410   | -1.8299  | -0.4325  |
| H(30) | 4.2170   | 1.6375   | -0.5630  |
| H(31) | 2.7581   | 1.7802   | -1.5516  |
| H(32) | 2.7952   | 2.4711   | 0.0827   |

Energy = -1872.87773 Hartrees (not corrected for ZPE).

**Table S6** Interatomic distances ( $r_a$  / pm), refined and calculated amplitudes of vibration ( $u$  / pm) and distance corrections ( $k_{hl}$  / pm) for the SARACEN-restrained GED structure of  $P\equiv C-Bu^t$ .<sup>a</sup>

|          | Atom pair  | $r_a$      | $u(\text{exp.})^b$      | $k_{hl}$ | $u(\text{calc.})$ |
|----------|------------|------------|-------------------------|----------|-------------------|
| $u_2$    | C(4)–H(5)  | 108.92(14) | 8.66(tied to $u_1$ )    | 0.4      | 7.6               |
| $u_1$    | C(4)–H(6)  | 108.93(14) | 8.63(14)                | 0.4      | 7.6               |
| $u_3$    | C(1)–C(3)  | 147.78(16) | 5.34(tied to $u_4$ )    | 0.1      | 4.8               |
| $u_4$    | C(3)–C(4)  | 154.10(7)  | 5.69(8)                 | 0.1      | 5.1               |
| $u_5$    | C(1)–P(2)  | 154.90(10) | 4.28(tied to $u_4$ )    | 0.1      | 3.8               |
| $u_6$    | H(6)⋯H(7)  | 174.4(1)   | 12.3(fixed)             | –0.1     | 12.3              |
| $u_7$    | H(5)⋯H(6)  | 175.6(6)   | 12.3(fixed)             | 0.0      | 12.3              |
| $u_8$    | C(3)⋯H(5)  | 217.5(3)   | 10.7(tied to $u_9$ )    | –0.2     | 10.7              |
| $u_9$    | C(3)⋯H(6)  | 218.9(3)   | 10.6(3)                 | –0.2     | 10.6              |
| $u_{10}$ | C(1)⋯C(4)  | 246.2(1)   | 7.4(1)                  | –0.1     | 7.2               |
| $u_{11}$ | C(4)⋯C(8)  | 251.6(2)   | 7.5(tied to $u_{10}$ )  | –0.1     | 7.2               |
| $u_{12}$ | H(5)⋯H(11) | 256.5(10)  | 24.0(fixed)             | 2.4      | 24.0              |
| $u_{13}$ | H(6)⋯H(10) | 260.2(15)  | 23.9(fixed)             | 2.5      | 23.9              |
| $u_{14}$ | C(1)⋯H(6)  | 273.1(5)   | 14.7(3)                 | 0.0      | 16.2              |
| $u_{15}$ | C(4)⋯H(11) | 275.9(5)   | 14.9(tied to $u_{14}$ ) | 0.1      | 16.5              |
| $u_{16}$ | C(4)⋯H(10) | 277.5(7)   | 14.8(tied to $u_{14}$ ) | 0.1      | 16.4              |
| $u_{17}$ | C(4)⋯H(14) | 277.5(7)   | 14.8(tied to $u_{14}$ ) | 0.1      | 16.4              |
| $u_{18}$ | P(2)⋯C(3)  | 301.7(2)   | 6.0(2)                  | –1.0     | 5.2               |
| $u_{19}$ | H(5)⋯H(10) | 309.7(10)  | 26.1(fixed)             | –0.8     | 26.1              |
| $u_{20}$ | H(5)⋯H(14) | 309.7(10)  | 26.1(fixed)             | –0.8     | 26.1              |
| $u_{21}$ | C(1)⋯H(5)  | 340.0(3)   | 12.8(tied to $u_{22}$ ) | –1.5     | 10.2              |
| $u_{22}$ | C(4)⋯H(9)  | 346.8(2)   | 12.9(5)                 | –1.4     | 10.2              |
| $u_{23}$ | H(5)⋯H(9)  | 375.2(6)   | 17.6(fixed)             | –1.7     | 17.6              |
| $u_{24}$ | H(5)⋯H(15) | 375.2(6)   | 17.6(fixed)             | –1.7     | 17.6              |
| $u_{25}$ | H(6)⋯H(9)  | 376.8(5)   | 17.5(fixed)             | –1.7     | 17.5              |
| $u_{26}$ | P(2)⋯C(4)  | 381.0(1)   | 11.3(1)                 | –1.4     | 11.4              |
| $u_{27}$ | P(2)⋯H(6)  | 385.1(7)   | 22.7(tied to $u_{26}$ ) | –0.9     | 22.9              |
| $u_{28}$ | P(2)⋯H(7)  | 385.1(7)   | 22.7(tied to $u_{26}$ ) | –0.9     | 22.9              |
| $u_{29}$ | H(6)⋯H(15) | 432.4(5)   | 13.6(fixed)             | –2.5     | 13.6              |
| $u_{30}$ | P(2)⋯H(5)  | 482.5(2)   | 13.14(8)                | –3.5     | 12.3              |

<sup>a</sup> Estimated standard deviations, as obtained in the least squares refinement, are given in parentheses. <sup>b</sup> Amplitudes not refined were fixed at the values obtained using the force field calculated at the MP2/6-311+G\* level.

**Table S7** Least-squares correlation matrix ( $\times 100$ ) for  $\text{P}\equiv\text{C}-\text{Bu}^{\dagger}$ .<sup>a</sup>

|       | $p_2$ | $p_5$ | $u_{10}$ | $k_2$ |
|-------|-------|-------|----------|-------|
| $p_1$ | -72   |       |          |       |
| $p_3$ |       | 53    |          |       |
| $p_4$ |       |       |          | 54    |
| $p_5$ |       | 100   | 50       |       |
| $u_1$ |       |       |          | 62    |
| $u_4$ |       |       |          | 77    |

<sup>a</sup> Only elements with absolute values  $\geq 50\%$  are shown;  $k_2$  is a scale factor.

**Table S8** GED coordinates for  $\text{P}\equiv\text{C}-\text{Bu}^t$ .

| Atom  | <i>x</i> | <i>y</i> | <i>z</i> |
|-------|----------|----------|----------|
| C(1)  | 0.0000   | 0.0000   | 0.0000   |
| P(2)  | -1.5496  | 0.0000   | 0.0000   |
| C(3)  | 1.4787   | 0.0000   | 0.0000   |
| C(4)  | 1.9908   | -0.7273  | 1.2597   |
| H(5)  | 3.0828   | -0.7399  | 1.2815   |
| H(6)  | 1.6443   | -0.2444  | 2.1762   |
| H(7)  | 1.6443   | -1.7624  | 1.2998   |
| C(8)  | 1.9908   | 1.4545   | 0.0000   |
| H(9)  | 1.6443   | 2.0068   | -0.8764  |
| H(10) | 1.6443   | 2.0068   | 0.8764   |
| H(11) | 3.0828   | 1.4797   | 0.0000   |
| C(12) | 1.9908   | -0.7273  | -1.2597  |
| H(13) | 3.0828   | -0.7399  | -1.2815  |
| H(14) | 1.6443   | -1.7624  | -1.2998  |
| H(15) | 1.6443   | -0.2444  | -2.1762  |

**Table S9** Calculated coordinates (MP2/6-311+G\*) for  $\text{P}\equiv\text{C}-\text{Bu}^t$ .

| Atom  | <i>x</i> | <i>y</i> | <i>z</i> |
|-------|----------|----------|----------|
| C(1)  | 0.0000   | 0.0000   | 0.7354   |
| P(2)  | 0.0000   | 0.0000   | 2.3063   |
| C(3)  | 0.0000   | 0.0000   | -0.7358  |
| C(4)  | 1.2584   | 0.7266   | -1.2381  |
| H(5)  | 1.2704   | 0.7335   | -2.3336  |
| H(6)  | 1.2774   | 1.7612   | -0.8842  |
| H(7)  | 2.1639   | 0.2256   | -0.8843  |
| C(8)  | -1.2584  | 0.7266   | -1.2381  |
| H(9)  | -2.1639  | 0.2257   | -0.8842  |
| H(10) | -1.2774  | 1.7612   | -0.8843  |
| H(11) | -1.2704  | 0.7334   | -2.3336  |
| C(12) | 0.0000   | -1.4531  | -1.2381  |
| H(13) | 0.0000   | -1.4669  | -2.3336  |
| H(14) | 0.8865   | -1.9869  | -0.8842  |
| H(15) | -0.8866  | -1.9869  | -0.8843  |

Energy = -536.13417 Hartrees (not corrected for ZPE).

**Table S10** Calculated coordinates (MP2/6-311+G\*) for **3**.

| Atom  | <i>x</i> | <i>y</i> | <i>z</i> |
|-------|----------|----------|----------|
| P(1)  | -1.0855  | 0.9138   | -0.1441  |
| C(2)  | 0.0933   | -0.1797  | -1.0534  |
| P(3)  | 1.6355   | 0.1938   | 0.0640   |
| Cl(4) | -2.9509  | -0.1222  | -0.3180  |
| C(5)  | 0.2010   | -0.1223  | -2.5779  |
| C(6)  | -1.1066  | -0.6084  | -3.2246  |
| C(7)  | 0.4180   | 1.3439   | -2.9852  |
| C(8)  | 1.3709   | -0.9422  | -3.1266  |
| H(9)  | -1.3910  | -1.6048  | -2.8817  |
| H(10) | -1.9370  | 0.0683   | -3.0083  |
| H(11) | -0.9788  | -0.6399  | -4.3125  |
| H(12) | 1.3742   | 1.7222   | -2.6089  |
| H(13) | 0.4205   | 1.4252   | -4.0774  |
| H(14) | -0.3771  | 1.9916   | -2.6041  |
| H(15) | 1.4963   | -0.7187  | -4.1916  |
| H(16) | 2.3130   | -0.6956  | -2.6253  |
| H(17) | 1.1952   | -2.0149  | -3.0397  |
| P(18) | -0.0810  | -0.2613  | 1.4487   |
| C(19) | 0.4331   | -1.2536  | -0.0467  |
| C(20) | 0.6784   | -2.7628  | -0.0523  |
| C(21) | -0.3861  | -3.4288  | -0.9330  |
| H(22) | -1.3895  | -3.0898  | -0.6562  |
| H(23) | -0.2295  | -3.2098  | -1.9906  |
| H(24) | -0.3436  | -4.5168  | -0.8090  |
| C(25) | 2.0900   | -3.1470  | -0.5128  |
| H(26) | 2.8360   | -2.7543  | 0.1849   |
| H(27) | 2.1857   | -4.2386  | -0.5347  |
| H(28) | 2.3268   | -2.7690  | -1.5060  |
| C(29) | 0.5081   | -3.2875  | 1.3807   |
| H(30) | 0.7323   | -4.3593  | 1.4029   |
| H(31) | 1.1942   | -2.7911  | 2.0760   |
| H(32) | -0.5151  | -3.1464  | 1.7405   |

Energy = -1872.85805 Hartrees (not corrected for ZPE).

**Table S11** Calculated coordinates (MP2/6-311+G\*) for **4**.

| Atom  | <i>x</i> | <i>y</i> | <i>z</i> |
|-------|----------|----------|----------|
| C(1)  | -0.1811  | -1.4160  | -0.3459  |
| C(2)  | 1.7208   | 0.6349   | -0.0382  |
| P(3)  | -0.0211  | 0.3044   | 0.0648   |
| P(4)  | 1.2550   | -2.3468  | -0.1313  |
| P(5)  | 2.7301   | -0.7562  | 0.1074   |
| Cl(6) | -0.9909  | 1.4256   | -1.4136  |
| C(7)  | 2.2888   | 2.0532   | 0.0267   |
| C(8)  | 2.4389   | 2.5703   | -1.4161  |
| C(9)  | 1.3653   | 2.9856   | 0.8258   |
| C(10) | 3.6695   | 2.0711   | 0.6945   |
| H(11) | 3.1267   | 1.9314   | -1.9791  |
| H(12) | 1.4824   | 2.5950   | -1.9418  |
| H(13) | 2.8484   | 3.5870   | -1.4012  |
| H(14) | 1.2262   | 2.6145   | 1.8458   |
| H(15) | 1.8157   | 3.9823   | 0.8846   |
| H(16) | 0.3835   | 3.0976   | 0.3598   |
| H(17) | 4.0431   | 3.1002   | 0.7252   |
| H(18) | 3.6172   | 1.6930   | 1.7203   |
| H(19) | 4.3991   | 1.4694   | 0.1451   |
| C(20) | -1.5391  | -2.0744  | -0.5926  |
| C(21) | -2.6555  | -1.3501  | 0.1752   |
| C(22) | -1.8223  | -2.0246  | -2.1056  |
| C(23) | -1.5362  | -3.5424  | -0.1478  |
| H(24) | -2.4527  | -1.3525  | 1.2506   |
| H(25) | -2.7817  | -0.3155  | -0.1524  |
| H(26) | -3.6074  | -1.8654  | 0.0071   |
| H(27) | -1.0502  | -2.5726  | -2.6549  |
| H(28) | -2.7908  | -2.4938  | -2.3136  |
| H(29) | -1.8515  | -0.9999  | -2.4812  |
| H(30) | -2.5224  | -3.9795  | -0.3371  |
| H(31) | -0.7992  | -4.1361  | -0.6960  |
| H(32) | -1.3199  | -3.6307  | 0.9214   |

Energy = -1872.85295 Hartrees (not corrected for ZPE).

**Table S12** Calculated coordinates (MP2/6-311+G\*) for **5**.

| Atom  | <i>x</i> | <i>y</i> | <i>z</i> |
|-------|----------|----------|----------|
| C(1)  | 0.3586   | 0.0727   | -1.2306  |
| P(2)  | -0.5619  | 0.9442   | 0.0035   |
| P(3)  | 1.9490   | -0.3520  | -0.7135  |
| Cl(4) | -2.5393  | 0.2780   | 0.0407   |
| P(5)  | -0.0785  | -0.0134  | -2.6902  |
| C(6)  | -0.9534  | -1.2705  | -2.8498  |
| C(7)  | -0.8815  | 1.2328   | -3.0926  |
| C(8)  | 1.1249   | -0.1325  | -3.6336  |
| C(9)  | -0.3871  | -2.1668  | -2.5776  |
| H(10) | -1.8464  | -1.2237  | -2.2229  |
| H(11) | -1.2730  | -1.3685  | -3.8939  |
| H(12) | -0.2921  | 2.1415   | -2.9362  |
| H(13) | -1.1473  | 1.1737   | -4.1536  |
| H(14) | -1.8121  | 1.3220   | -2.5259  |
| H(15) | 0.7700   | -0.1951  | -4.6678  |
| H(16) | 1.7830   | 0.7379   | -3.5482  |
| H(17) | 1.7162   | -1.0301  | -3.4301  |
| P(18) | 0.3558   | 0.3318   | 1.8578   |
| C(19) | 1.8052   | -0.1748  | 1.0717   |
| C(20) | 3.0606   | -0.4795  | 1.8963   |
| C(21) | 2.7531   | -0.5702  | 3.3947   |
| H(22) | 2.0068   | -1.3440  | 3.6042   |
| H(23) | 3.6666   | -0.8282  | 3.9405   |
| H(24) | 2.3855   | 0.3799   | 3.7938   |
| C(25) | 3.6615   | -1.8216  | 1.4480   |
| H(26) | 3.9972   | -1.7980  | 0.4076   |
| H(27) | 4.5303   | -2.0626  | 2.0705   |
| H(28) | 2.9303   | -2.6295  | 1.5544   |
| C(29) | 4.0839   | 0.6470   | 1.6738   |
| H(30) | 4.3765   | 0.7187   | 0.6217   |
| H(31) | 3.6652   | 1.6109   | 1.9809   |
| H(32) | 4.9863   | 0.4579   | 2.2667   |

Energy = -1872.85447 Hartrees (not corrected for ZPE).



**Figure S1** Experimental and difference (experimental minus theoretical) molecular-scattering intensities for tricyclo- $P_3C_2(Bu^t)_2Cl$ .

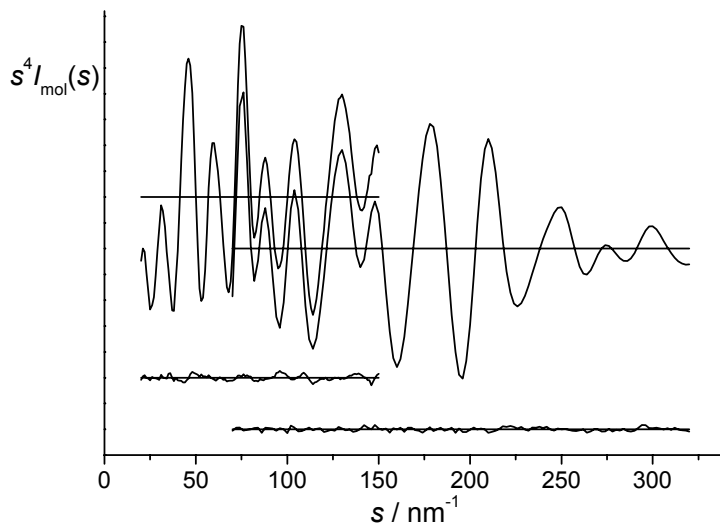

**Figure S2** Experimental and difference (experimental minus theoretical) molecular-scattering intensities for  $P\equiv C-Bu^t$ .

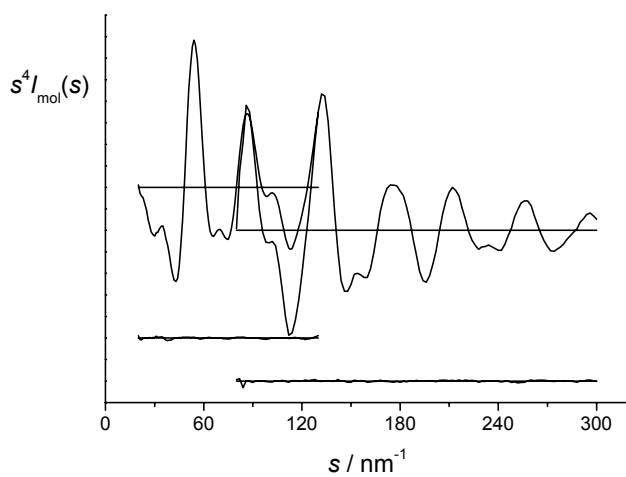

Supplement: c1dt10041f.pdf [file c1dt10041f.pdf]
